# Supplementary material for: Rational design of self-assembled RNA nanostructures for HIV-1 virus assembly blockade
Source: PubMed Central journal article supplement (PMC9071489; doi:10.1093/nar/gkab1282), 2021-12-30
Supplement: gkab1282_supplemental_file.pdf [file gkab1282_supplemental_file.pdf]

**SUPPLEMENTARY MATERIALS**  
**Rational design of self-assembled RNA**  
**nanostructures for HIV-1 virus assembly blockade**

Na Qu<sup>1</sup>, Yachen Ying<sup>1,2</sup>, Jinshan Qin<sup>1</sup>, and Antony K. Chen<sup>1,\*</sup>

<sup>1</sup>Department of Biomedical Engineering, College of Future Technology, Peking University, Beijing 100871, China

<sup>2</sup>Department of Biomedical Engineering, College of Engineering, Peking University, Beijing 100871, China

\*ADDRESS FOR CORRESPONDENCE:

ANTONY K. CHEN

Department of Biomedical Engineering

College of Future Technology, Peking University

No. 5 Yiheyuan Road.

Haidian District, Beijing 100871, China

Tel/Fax: +86 10 6276 8343

EMAIL: [chenak@pku.edu.cn](mailto:chenak@pku.edu.cn)

Table S1.

| <b>Oligo name</b>                  | <b>Sequence</b>                                                                                                                                         |
|------------------------------------|---------------------------------------------------------------------------------------------------------------------------------------------------------|
| STL1                               | <u>mGmUmC</u> <u>mAmCmC</u> mUmCmA mGmCmG mUmAmA mGmUmG<br>mAmUmG mUmC <u>mG</u> <u>mUmGmA</u> <u>mC</u>                                                |
| STL2                               | <u>mCmUmU</u> <u>mCmGmU</u> mCmCmA mCmAmA mAmCmA mCmAmA<br>mCmUmC mCmUmG <u>mAmAmG</u>                                                                  |
| STL3                               | <u>mCmUmA</u> <u>mGmCmU</u> mCmUmA mAmAmU mCmAmC mUmAmU<br>mCmCmU mCmGmC <u>mGmCmU</u> <u>mAmG</u>                                                      |
| STL4                               | <u>mGmGmU</u> <u>mCmGmU</u> mUmGmU mAmGmG mUmUmC mCmAmC<br>mUmGmG mUmU <u>mC</u> <u>mGmAmC</u> <u>mC</u>                                                |
| STL1 with<br>longer stem<br>length | <u>mGmUmC</u> <u>mAmCmG</u> <u>mUmCmA</u> <u>mCmCmU</u> mCmAmG mCmGmU<br>mAmAmG mUmGmA mUmGmU mC <u>mGmU</u> <u>mGmAmC</u> <u>mGmUmG</u><br><u>mAmC</u> |
| UN1                                | mCmUmC mAmGmC mGmUmA mAmGmU mGmAmU mGmUmC<br>mGmU                                                                                                       |
| UN2                                | mCmUmU mCmGmU mCmCmA mCmAmA mAmCmA mCmAmA<br>mCmUmC mCmUmG                                                                                              |
| UN3                                | mCmUmA mCmAmU mCmUmA mAmAmU mCmAmC mUmAmU<br>mCmCmU mCmGmC mGmCmU mA mA                                                                                 |
| UN4                                | mCmUmA mCmAmU mUmGmU mAmGmG mUmUmC mCmAmC<br>mUmGmG mUmUmGmCmU mA mA                                                                                    |
| STL1 target<br>RNA (for<br>duplex) | rUrGrG rArCrA rUrCrA rCrUrU rArCrG rCrUrG rArGrU rA                                                                                                     |
| Module 1<br>(MoD #1)               | <u>mGmAmC</u> <u>mAmGmC</u> mGmUmA mAmGmU mGmAmU mGmUmC<br>mGmUmG mAm <u>CmU</u> <u>mGmUmC</u> mGmAmG mCmUmG mCmAmC<br>mGmCmU mGmCmC mG                 |
| Module 2<br>(MoD #2)               | <u>mGmAmC</u> <u>mAmGmC</u> mGmUmA mAmGmU mGmAmU mGmUmC<br>mGmUmG mAm <u>CmU</u> <u>mGmUmC</u> mCmGmG mCmAmG mCmGmU<br>mGmCmA mGmCmU mC                 |
| Module 3<br>(MoD #3)               | <u>mGmAmC</u> <u>mAmGmC</u> mGmUmA mAmGmU mGmAmU mGmUmC<br>mGmUmG mAmCmU <u>mGmUmC</u> mCmGmG mCmAmG mCmGmA<br>mCmAmU mGmAmG mG                         |
| Module 4<br>(MoD #4)               | <u>mGmAmC</u> <u>mAmGmC</u> mGmUmA mAmGmU mGmAmU mGmUmC<br>mGmUmG mAmCmU <u>mGmUmC</u> mCmCmU mCmAmU mGmUmU<br>mGmCmA mGmCmU mC                         |

**Table S1. Nonsense oligonucleotides (oligos) used in this study.** Underlined letters indicate the stem. m represents 2'-O-methyl RNA modification. r represents no modification.

## pNL43 derivative constructs

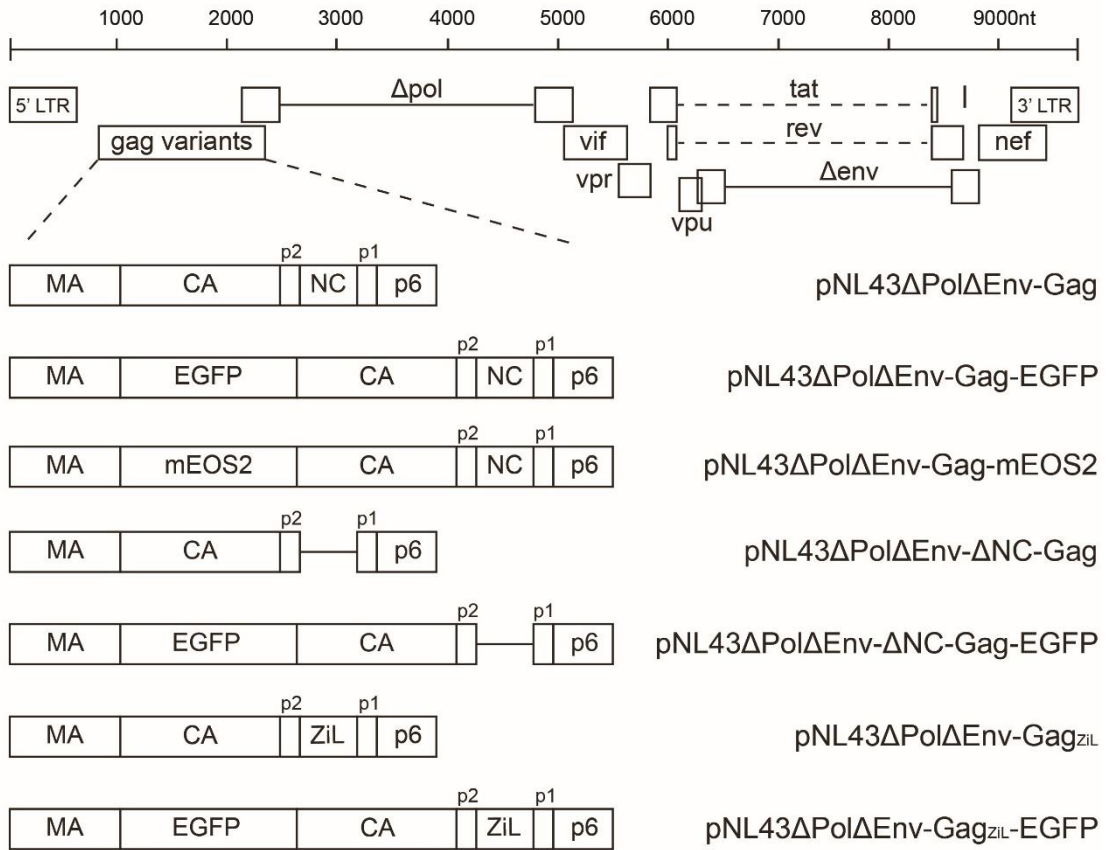

**Figure S1. Schematic representation of the plasmid constructs used in this study.**

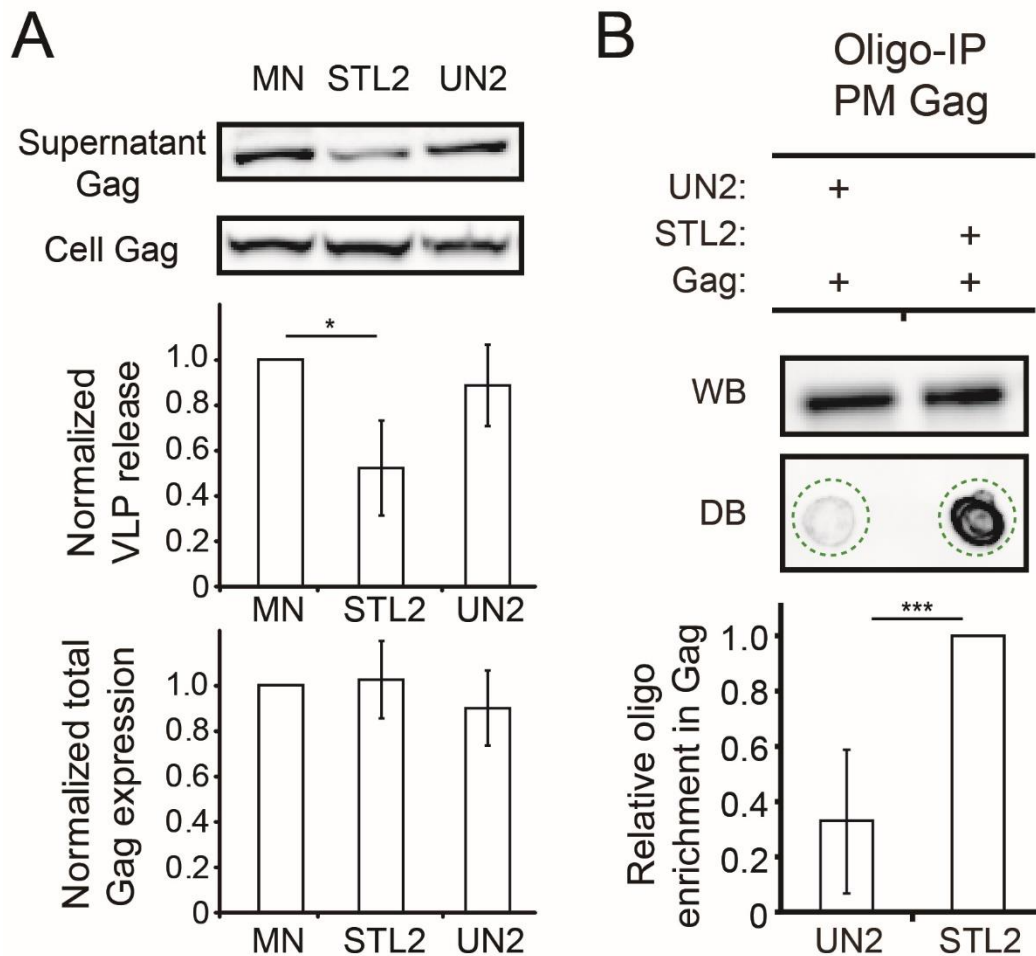

**Figure S2. Gag preferentially interacts with STL2 over UN2 at PM and the interaction inhibits HIV-1 viral production.** (A) Assessment of virus release efficiency and total Gag expression levels by western blot in mock-nucleofected (MN), UN2+ or STL2+ cells expressing Gag (through pNL43 $\Delta$ Pol $\Delta$ Env-Gag transfection). Results were normalized to the virus release and total Gag expression levels of MN cells. (B) Immunoprecipitation of the oligos in complex with Gag (through pNL43 $\Delta$ Pol $\Delta$ Env-Gag transfection) in the PM fraction of UN2+ and STL2+ cells (the oligos were tagged with a FAM fluorophore at the 5'-end). Immunoprecipitated Gag was detected by western blot (WB) and oligos in each immunoprecipitate was detected by dot blot (DB) as described in the Materials and Methods. Dashed circles indicate the location of the dots. Data represent mean  $\pm$  SD of three replicate experiments. Asterisks indicate *P*-values (\**P* < 0.05, \*\*\* *P* < 0.001).

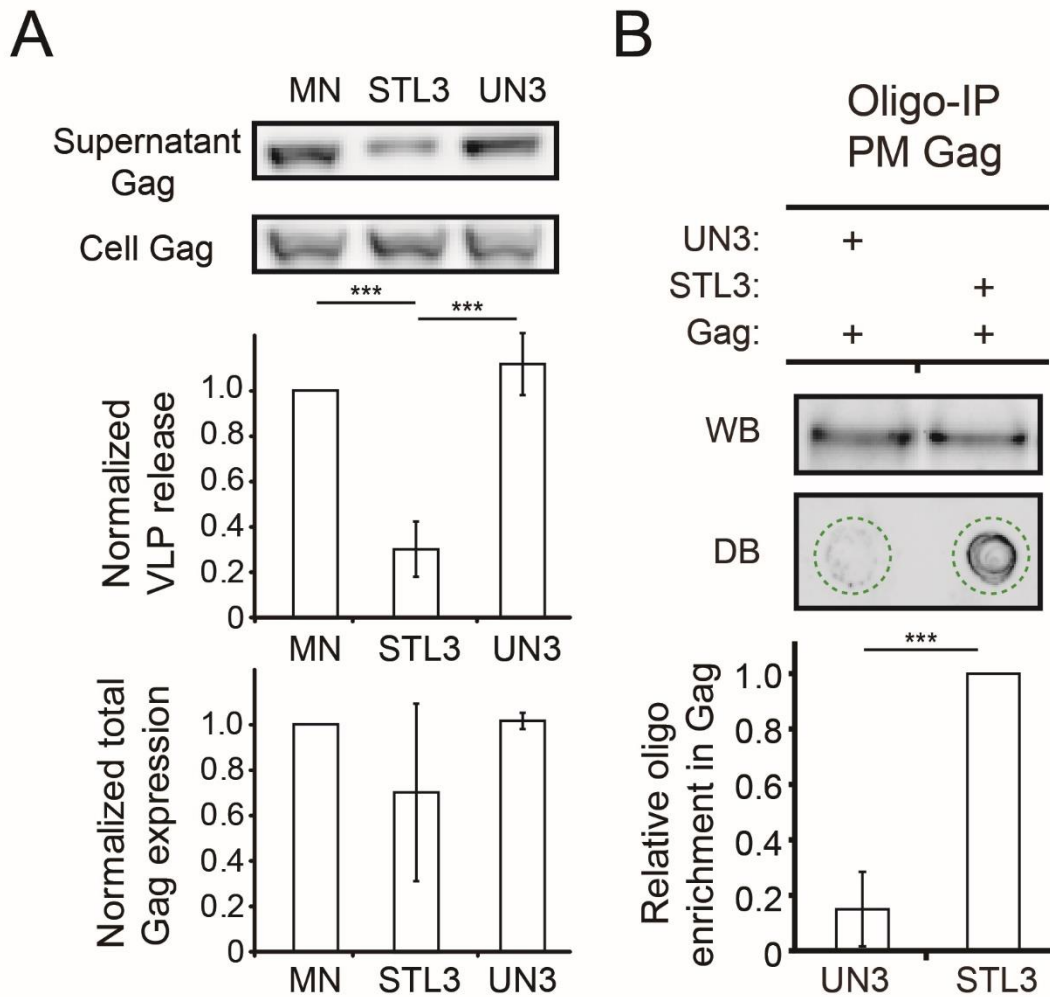

**Figure S3. Gag preferentially interacts with STL3 over UN3 at PM and the interaction inhibits HIV-1 viral production.** (A) Assessment of virus release efficiency and total Gag expression levels by western blot in mock-nucleofected (MN), UN3+ or STL3+ cells expressing Gag (through pNL43ΔPolΔEnv-Gag transfection). Results were normalized to the virus release and total Gag expression levels of MN cells. (B) Immunoprecipitation of the oligos in complex with Gag (through pNL43ΔPolΔEnv-Gag transfection) in the PM fraction of UN3+ and STL3+ cells (the oligos were tagged with a FAM fluorophore at the 5'-end). Immunoprecipitated Gag was detected by western blot (WB) and oligos in each immunoprecipitate was detected by dot blot (DB) as described in the Materials and Methods. Dashed circles indicate the location of the dots. Data represent mean  $\pm$  SD of three replicate experiments. Asterisks indicate  $P < 0.001$ .

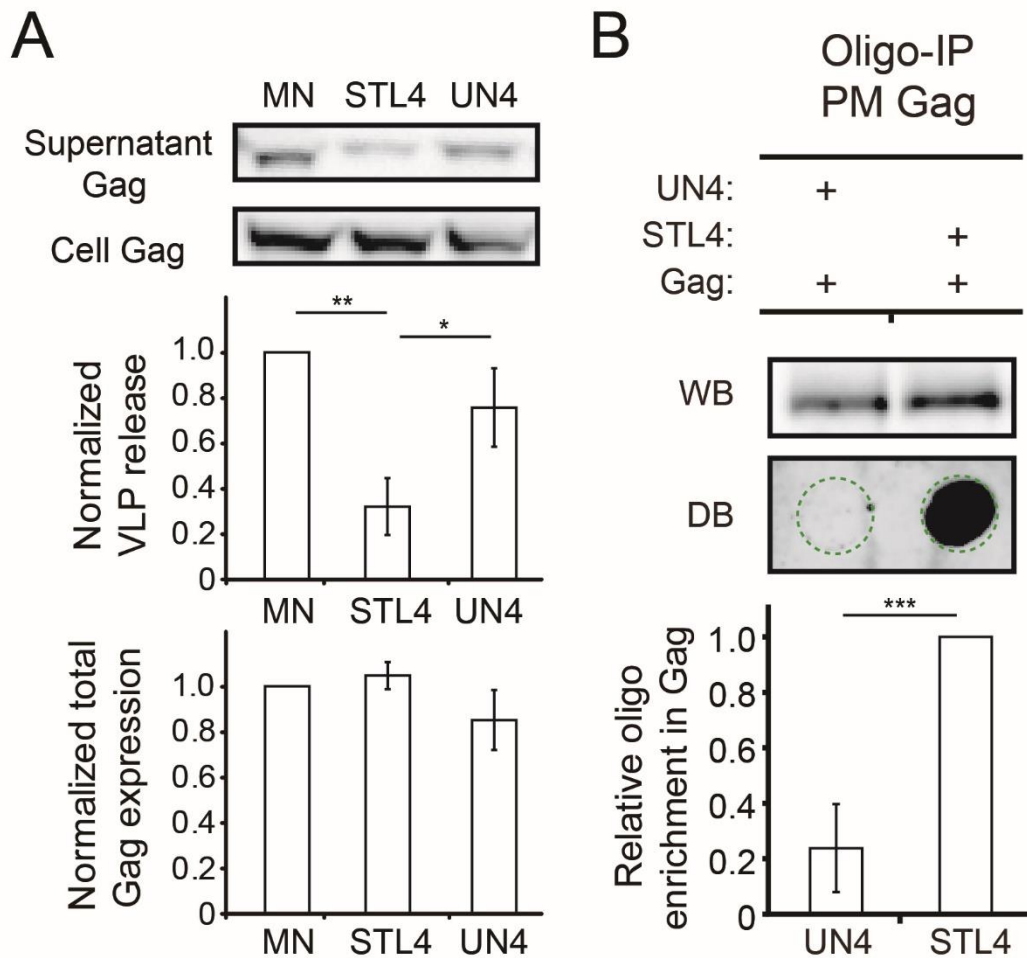

**Figure S4. Gag preferentially interacts with STL4 over its unstructured analog (UN4) at PM and the interaction inhibits HIV-1 viral production.** (A) Assessment of virus release efficiency and total Gag expression levels by western blot in mock-nucleofected (MN), UN4+ or STL4+ cells expressing Gag (through pNL43ΔPolΔEnv-Gag transfection). Results were normalized to the virus release and total Gag expression levels of MN cells. (B) Immunoprecipitation of the oligos in complex with Gag (through pNL43ΔPolΔEnv-Gag transfection) in the PM fraction of UN1+ and STL1+ cells (the oligos were tagged with a FAM fluorophore at the 5'-end). Immunoprecipitated Gag was detected by western blot (WB) and oligos in each immunoprecipitate was detected by dot blot (DB) as described in the Materials and Methods. Dashed circles indicate the location of the dots. Data represent mean  $\pm$  SD of three replicate experiments. Asterisks indicate *P*-values (\**P* < 0.05, \*\* *P* < 0.01, \*\*\* *P* < 0.001).

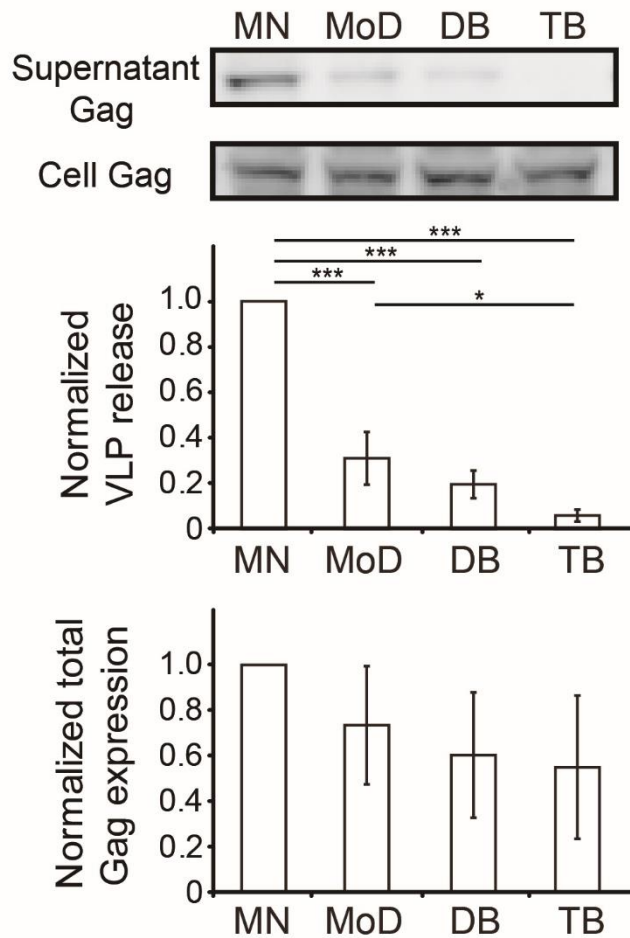

**Figure S5. The impact of stem-loop (STL) forming oligonucleotides and self-assembled STL-decorated nanostructures on HIV-1 viral production in Jurkat cells.** Virus release efficiency and total Gag expression levels were assessed in Jurkat cells expressing Gag (through pNL43 $\Delta$ Pol $\Delta$ Env-Gag transfection) that are nucleofected in the absence of oligos (mock-nucleofected, MN) or in the presence of 1  $\mu$ M of STL module oligo #1 (MoD #1), 0.5  $\mu$ M of dumbbell (DB) oligos and 0.33  $\mu$ M of Tribell (TB) oligos. Results were normalized to the virus release and total Gag expression levels of MN cells. Data represent mean  $\pm$  SD of three replicate experiments. Asterisks indicate *P*-values (\**P* < 0.05, \*\*\* *P* < 0.001).

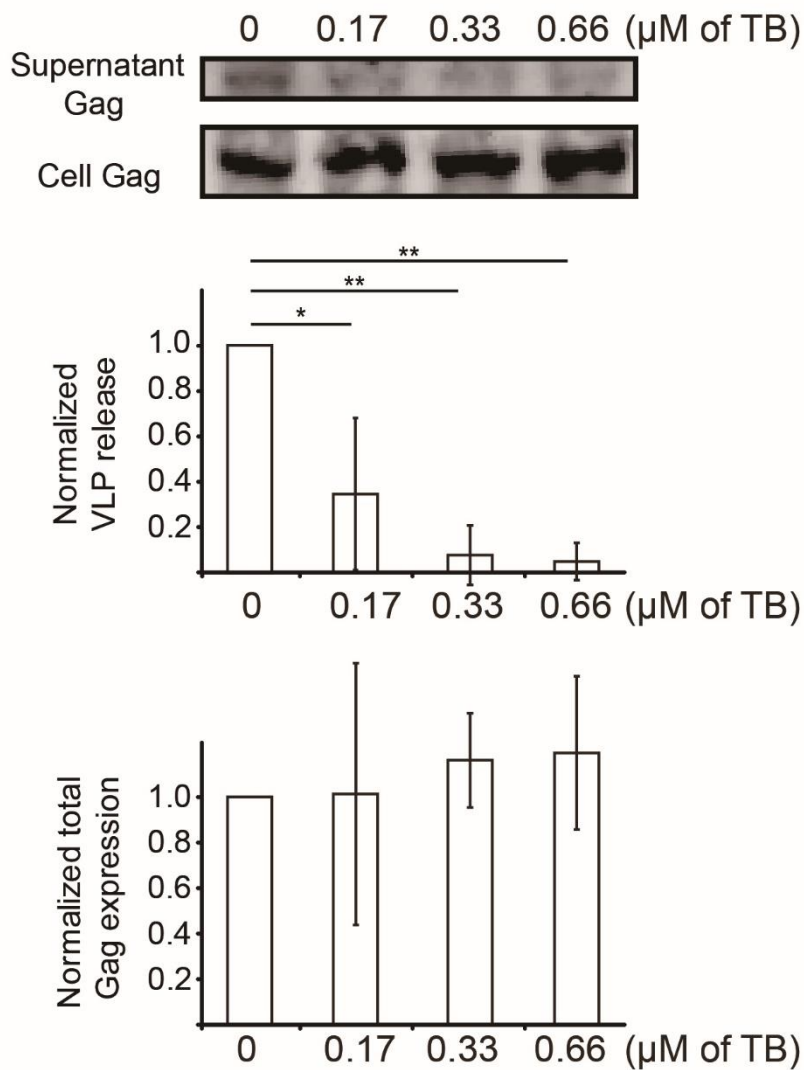

**Figure S6. Tribell (TB) nanostructures inhibit HIV-1 viral production in a dose-dependent manner in Jurkat cells.** Virus release efficiency and total Gag expression levels were assessed in Jurkat cells transfected with pNL43ΔPolΔEnv-Gag followed by nucleofection in the presence of different quantities of TB. Results were normalized to the virus release and total Gag expression levels of cells microperated with no oligos (i.e., mock-nucleofected cells). Data represent mean  $\pm$  SD of four replicate experiments. Asterisks indicate *P*-values (\**P* < 0.05, \*\**P* < 0.01).
